# Supplementary material
Source: publisher site journal article supplement (https://www.dovepress.com/article/366067)
Supplement: Supplementary file 1 [file get_supplementary_file.php]

Yes

Assess visual acuity and extent of orbital involvement

Vision preserved, No or limited involvement of the orbit

Early and aggressive debridement of the nasal cavity and paranasal sinuses +/- lamina papricia resection with clean edges

Extensive orbital involvement

MRI with contrast and Diffusion: orbital infarction

Yes

No

Documented improvement or stabilization of orbital and metabolic conditions within 72 hours

No

Retrobulbar Amphotericin B 3.5 mg/ml +/- sinus irrigation with Amphotericin B 1.0 mg/ml, endoscopy and MRI guided debridement

Exenteration

Documented deterioration

Documented improvement

Endoscopy and aggressive MRI guided debridement +/- sinus irrigation with Amphotericin B 1.0 mg/ml.

IV Amphotericin B 5-10 mg/kg BW for a minimum of 4 weeks, followed by step-down treatment oral Posaconazole 300 mg twice a day on day 1, 300 mg once a day from day 2 for 3-6 months or for a minimum of 6 weeks after clinical and radiological improvement or stabilization
